# Supplementary figures and images for: Lost in the Forest: Encoding categorical variables and the absent levels problem
Source: Springer Nature journal article supplement (doi:10.1007/s10618-024-01019-w), 2024-04-10

### CA

### CA-unbiased

### PCO

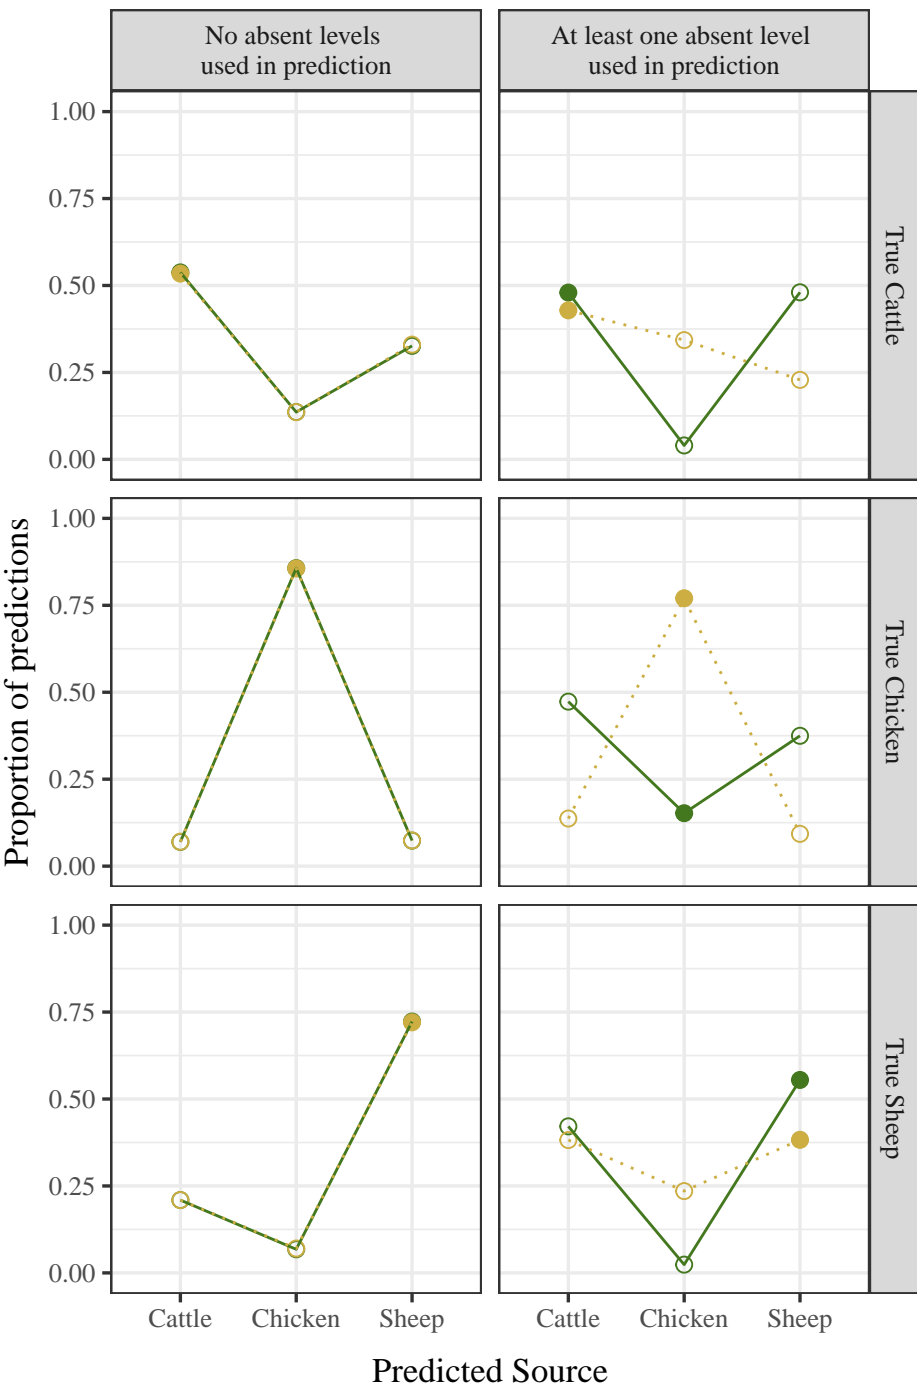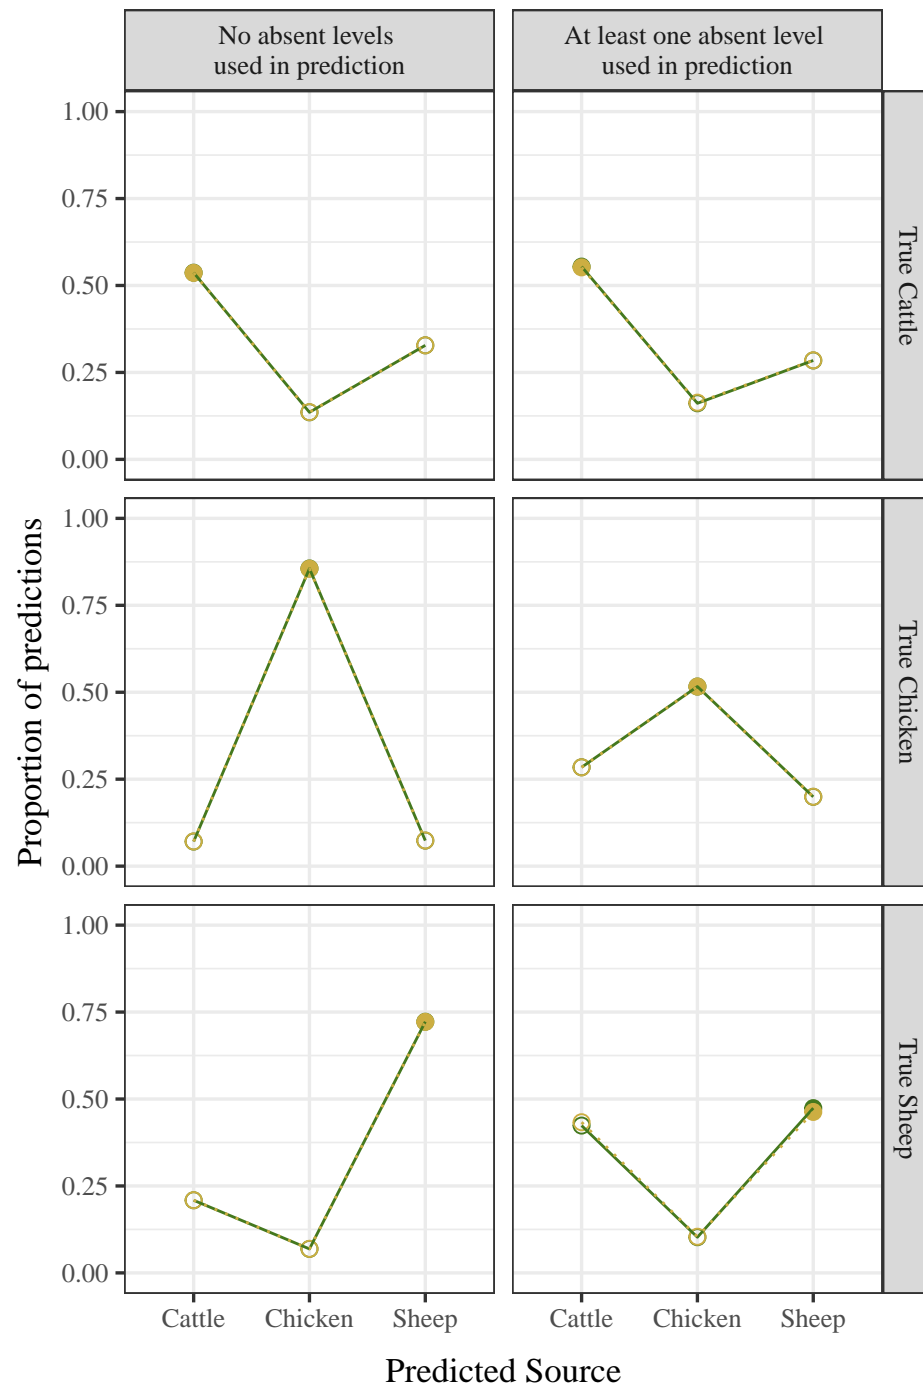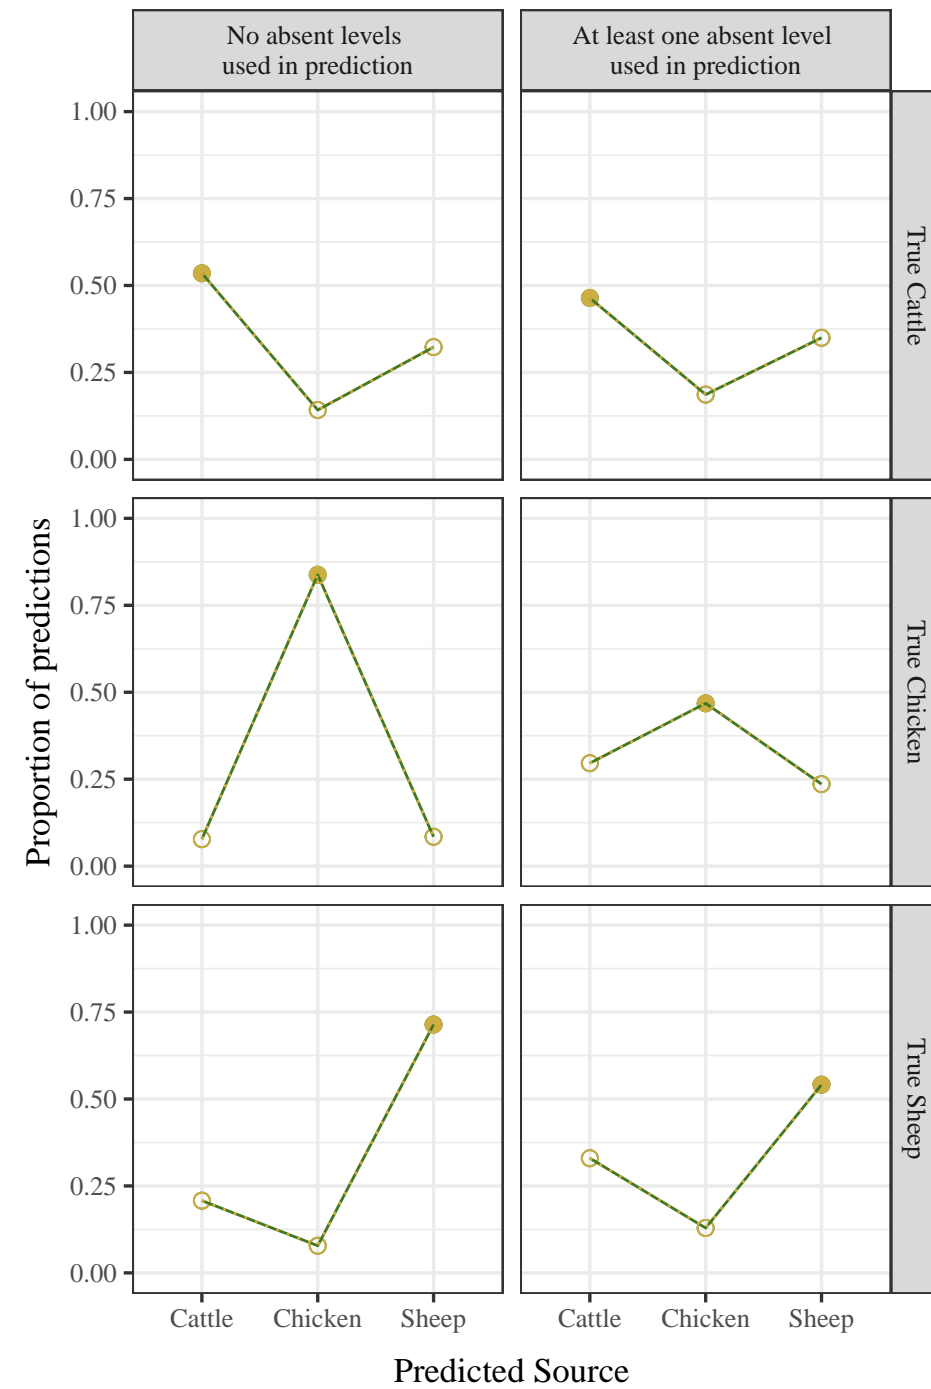

Order of response class

- Cattle>Chicken>Sheep
- Chicken>Sheep>Cattle

Supplement: MOESM1 [file 26965200]

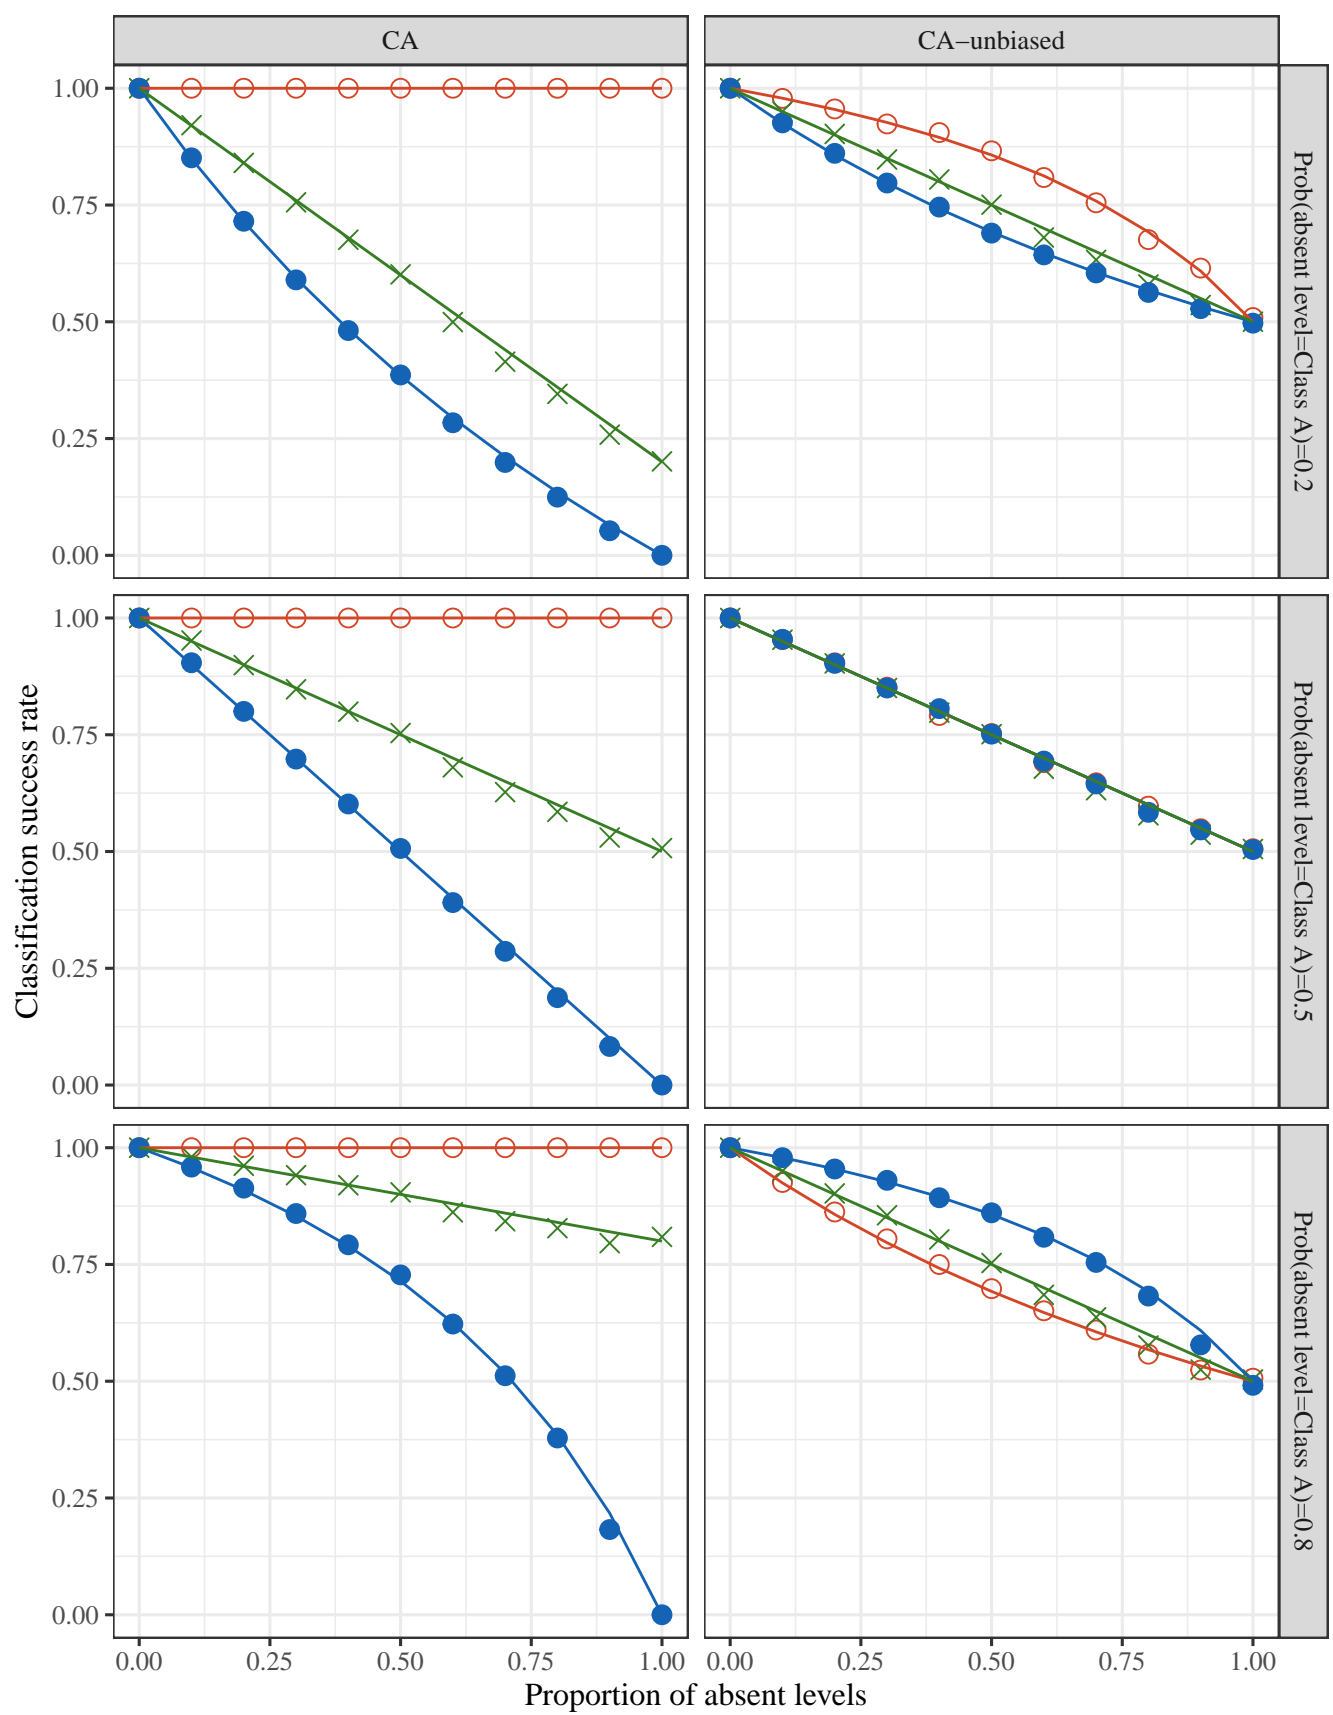

Supplement: MOESM2 [file 26965200]
